# Supplementary material for: Beachgoers' ability to identify rip currents at a beach in situ
Source: Copernicus journal article supplement (doi:10.5194/nhess-21-115-2021), 2021-01-14
Supplement: Supplementary file 1 [file nhess-21-115-2021-supplement.pdf]

Supplement of Nat. Hazards Earth Syst. Sci., 21, 115–128, 2021  
<https://doi.org/10.5194/nhess-21-115-2021-supplement>  
© Author(s) 2021. This work is distributed under  
the Creative Commons Attribution 4.0 License.

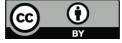

*Supplement of*

## **Beachgoers' ability to identify rip currents at a beach in situ**

**Sebastian J. Pitman et al.**

*Correspondence to:* Sebastian Pitman ([sebastian.pitman@canterbury.ac.nz](mailto:sebastian.pitman@canterbury.ac.nz))

The copyright of individual parts of the supplement might differ from the CC BY 4.0 License.

## BEACH SAFETY SURVEY

Please tick the appropriate box & provide additional information where needed. Most questions are about your beach experiences in general (i.e not about the beach you are visiting today)

### A BIT ABOUT YOU...

Are you:

- Male    Female    Gender diverse

Are you:

- Māori    New Zealand European  
 Samoan    Cook Islander  
 Tongan    Niuean  
 Chinese    Indian  
 Other (please state):

Do you live in New Zealand?

- Yes    No

If *no*, where are you from?

---

If *yes*, how many years have you lived in New Zealand?

- All my life    More than 10 years  
 5-9 years    Less than 5 years

How old are you?

- 0-10 yrs    40-49 yrs  
 10-19 yrs    50-59 yrs  
 20-29 yrs    60-69 yrs  
 30-39 yrs    70+ yrs

### SOME QUESTIONS ABOUT YOUR TIME AT THE BEACH...

Is this your local beach?

- Yes    No

When you visit the beach, do you (tick all that apply):

- Stay in depths of water where you can still stand up  
 Go into water depths greater than your height  
 Swim  
 Surf  
 Other (please state):

How often do you visit beaches in the Summer?

- Daily    2-3 times a week  
 Once a week    Once a month  
 Infrequently

How long have you been visiting the beach this often?

- Weeks    Months  
 Years    Unsure

Can you swim?

- Yes    No

If *yes*, rate your swimming ability:

- Poor    Good  
 Fair    Very good

How far (in metres) could you swim in a pool without stopping?

- Less than 25    101-200  
 25-50    More than 200  
 51-100

**How do you feel about swimming that same distance at the beach?**

- Very anxious       Confident
- Anxious           Very confident
- Unsure

**When was the last time you swam that distance?**

- This week           More than a year ago
- This month         Unsure
- This year

**Can you float effectively on your front and back?**

- Yes       No       Unsure

**Can you swim effectively on your front and back?**

- Yes       No       Unsure

**Can you tread water for more than 2 minutes?**

- Yes       No       Unsure

**BEACH HAZARDS**

**What do the red/yellow flags mean on a New Zealand beach?**

- Area patrolled by lifeguards
- Dangerous area of beach
- For surfers only
- Unsure

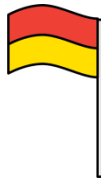

**When would you swim outside the patrolled area?**

- Never                       Anytime
- If the patrolled area is too busy       If I want to swim long distances
- Other (please specify):

\_\_\_\_\_

**How do you choose a safe area to swim at the beach?**

\_\_\_\_\_  
\_\_\_\_\_  
\_\_\_\_\_  
\_\_\_\_\_

**What hazards can occur at the beach?**

\_\_\_\_\_  
\_\_\_\_\_  
\_\_\_\_\_  
\_\_\_\_\_

**What hazards have you personally experienced at the beach?**

\_\_\_\_\_  
\_\_\_\_\_  
\_\_\_\_\_  
\_\_\_\_\_

**Rip currents are a common hazard at the beach for swimmers. What do you think makes a rip current dangerous?**

\_\_\_\_\_  
\_\_\_\_\_  
\_\_\_\_\_  
\_\_\_\_\_

**How confident would you feel about coping with a rip current?**

- Very anxious       Confident
- Anxious           Very confident
- Unsure

**Have you ever been caught in a rip current?**

- Yes       No       Unsure

**Do you know what to do if you find yourself accidentally caught in a rip current?**

- Yes     No     Unsure

**If yes, what action(s) would you take?**

---

---

---

---

**Could you spot a rip current?**

- Yes     No     Unsure

**If asked to identify a rip current on a beach, what would you look for?**

---

---

---

---

**Put a mark anywhere you think you can see a rip current in the images below:**

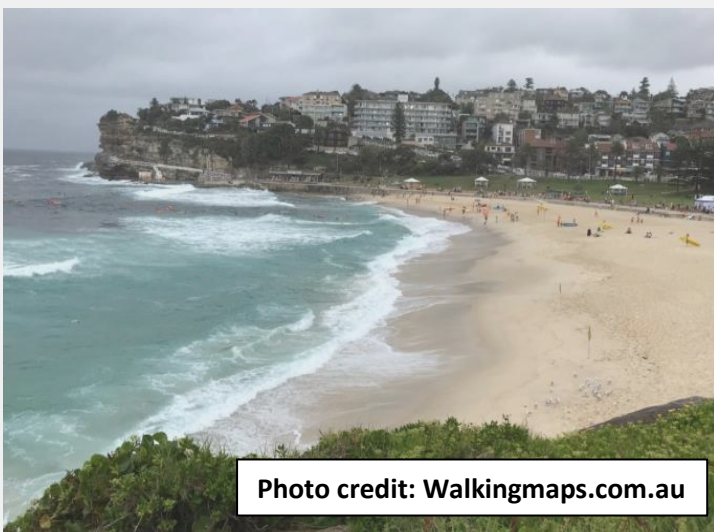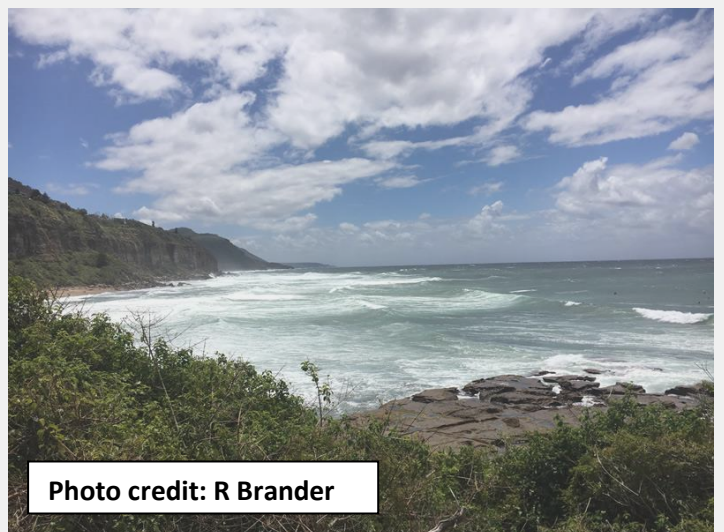

**Have you had the opportunity to learn about rip currents before?**

- Yes     No     Unsure

**If yes, how did you learn about rip currents?**

---

---

---

**Is there any other information you'd like to share about rip currents?**

---

---

---

---

**What ways might be best for helping people learn about rip currents? How would you have liked to learn about keeping beach safe and rip currents?**

---

---

---

***Thank you for taking the time to fill out this survey. Please place your completed survey in the sealed envelope.***
